# Supplementary material
Source: PubMed Central journal article supplement (PMC2913662)
Supplement: supp_btp555_bioinf-2009-1142-File002.pdf [file supp_btp555_bioinf-2009-1142-File002.pdf]

| Method      | Accuracy | Sensitivity<br>1 | Specificity<br>1 | Sensitivity<br>0 | Specificity<br>0 |
|-------------|----------|------------------|------------------|------------------|------------------|
| Fixed E-04  | 95.06    | 93.52            | 97.65            | 97.08            | 92.01            |
| HHsvm1      | 95.22    | 93.58            | 97.88            | 97.36            | 92.09            |
| HHsvm2      | 96.20    | 95.25            | 98.04            | 97.52            | 93.96            |
| HHsvm3      | 97.50    | 96.87            | 98.68            | 98.32            | 96.02            |
| HHsvm4      | 97.85    | 97.50            | 98.69            | 98.31            | 96.79            |
| HHsvm4-0.95 | 99.28    | 99.13            | 99.67            | 99.52            | 98.72            |

**Supplementary Table I.** Homology assignments using fixed  $P$ -value threshold and HHsvm classifiers trained with widely used RBF kernel. This table is provided for comparison with Table I from the manuscript, which is derived from experiments using the perceptron kernel (Lin and Li, 2008).
