# Supplementary material
Source: PubMed Central journal article supplement (PMC2913662)
Supplement: supp_btp555_bioinf-2009-1142-File003.pdf [file supp_btp555_bioinf-2009-1142-File003.pdf]

| Pfam #  | Description                                              | PD-(D/E)xK | P-value | HHsvm4 |
|---------|----------------------------------------------------------|------------|---------|--------|
| PF03008 | Archaea bacterial proteins of unknown function           | PF02021    | 3.1E-08 | 0.998  |
| PF03838 | Recombination protein U                                  | PF01870    | 6.1E-06 | 0.883  |
| PF04257 | Exodeoxyribonuclease V, gamma subunit                    | PF06023    | 1.5E-18 | 1.000  |
| PF04556 | DpmlI restriction endonuclease                           | PF02646    | 1.6E-03 | 0.709  |
| PF05367 | Phage endonuclease I                                     | PF06356    | 2E-07   | 0.996  |
| PF08696 | DNA replication factor Dna2                              | PF06023    | 1.3E-15 | 1.000  |
| PF08814 | XisH protein                                             | PF04471    | 6.1E-04 | 1.000  |
| PF09002 | Domain of unknown function (DUF1887)                     | PF10356    | 8E-07   | 0.998  |
| PF09019 | EcoRII C terminal                                        | PF01870    | 1.1E-03 | 0.626  |
| PF09254 | Restriction endonuclease FokI, C terminal                | PF10356    | 3.5E-04 | 0.576  |
| PF09563 | LlaJI restriction endonuclease                           | PF04411    | 2.5E-09 | 0.983  |
| PF09588 | YqaJ viral recombinase family                            | PF01771    | 1.8E-33 | 1.000  |
| PF09810 | Defects in morphology protein 1, mitochondrial precursor | PF06023    | 8E-19   | 1.000  |
| PF09903 | Uncharacterized protein conserved in bacteria (DUF2130)  | PF02646    | 4.6E-06 | 1.000  |
| PF10117 | McrBC 5-methylcytosine restriction system component      | PF04411    | 2E-13   | 1.000  |

**Supplementary Table II.** The list and descriptions of new Pfam families predicted to be members of the PD-(D/E)xK clan (CL0236) (Finn *et al.*, 2008). Values on the right represent the best evidence for this assignment based on profile-profile score to a known member of the PD-(D/E)xK clan. *P*-values were taken directly from HHsearch outputs and HHsvm4 column shows the probabilities that these hits are true homologues.
