# Supplementary material
Source: PubMed Central journal article supplement (PMC2913662)
Supplement: supp_btp555_bioinf-2009-1142-File004.pdf [file supp_btp555_bioinf-2009-1142-File004.pdf]

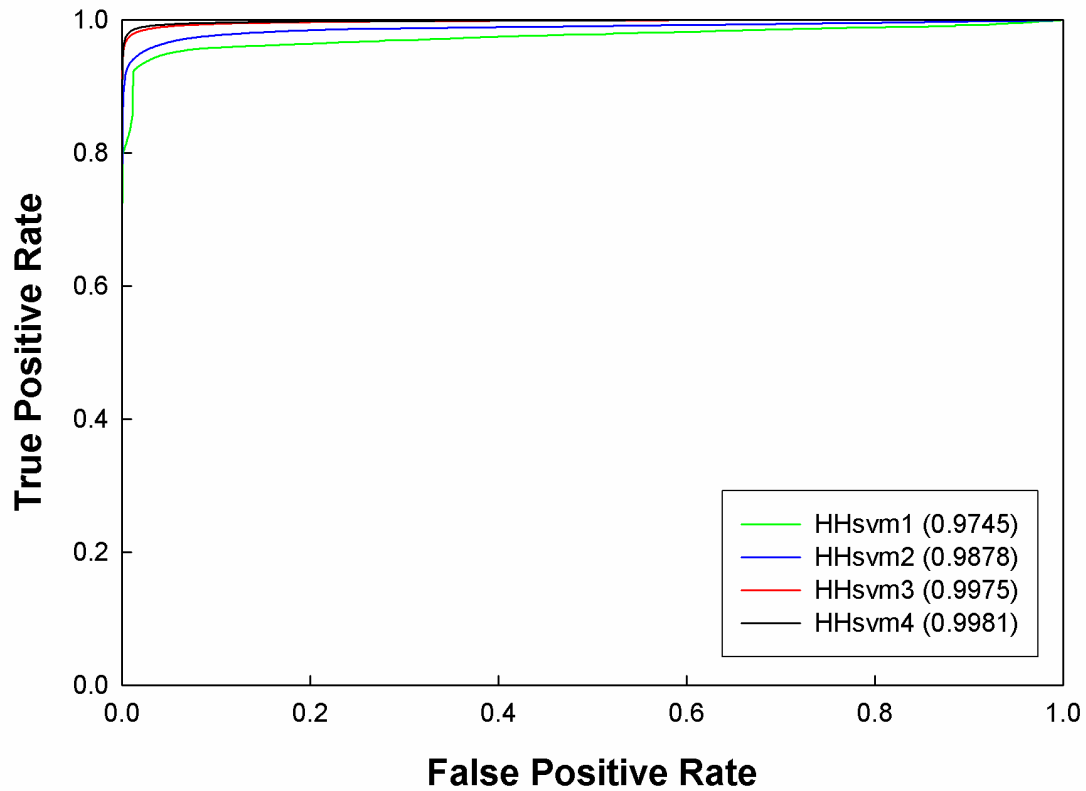

**Supplementary Figure 1.** Receiver operating characteristic (ROC) curves (Fawcett, 2006) of SVM classifiers described in the main text. The area under curve (AUC) for each classifier is shown in the box. The perfect classifier has AUC of 1.
