# Supplementary material
Source: PubMed Central journal article supplement (PMC2913662)
Supplement: supp_btp555_bioinf-2009-1142-File006.pdf [file supp_btp555_bioinf-2009-1142-File006.pdf]

## References

- Aravind, L., Makarova, K.S. and Koonin, E.V. (2000) Holliday junction resolvases and related nucleases: identification of new families, phyletic distribution and evolutionary trajectories, *Nucleic Acids Res.*, **28**, 3417-3432.
- Fawcett, T. (2006) An introduction to ROC analysis, *Patt. Recogn. Lett.*, **27**, 861-874.
- Finn, R.D., Tate, J., Mistry, J., Coghill, P.C., Sammut, S.J., Hotz, H.R., Ceric, G., Forslund, K., Eddy, S.R., Sonnhammer, E.L. and Bateman, A. (2008) The Pfam protein families database, *Nucleic Acids Res.*, **36**, D281-288.
- Lin, H.-T. and Li, L. (2008) Support Vector Machinery for Infinite Ensemble Learning, *J. Mach. Learn. Res.*, **9**, 285-312.
- Schuster-Bockler, B. and Bateman, A. (2005) Visualizing profile-profile alignment: pairwise HMM logos, *Bioinformatics*, **21**, 2912-2913.
